# Supplementary material for: Alteration in Auxin Homeostasis and Signaling by Overexpression Of PINOID Kinase Causes Leaf Growth Defects in Arabidopsis thaliana
Source: PubMed Central journal article supplement (PMC5470171; doi:10.3389/fpls.2017.01009), 2017-06-14
Supplement: Data_Sheet_3.pdf [file Data_Sheet_3.pdf]

### *Supplementary Material*

## **Alteration in auxin homeostasis and signaling by overexpression of PINOID kinase causes leaf growth defects in *Arabidopsis thaliana***

Kumud Saini, Marios Nektarios Markakis, Malgorzata Zdanio, Daria Balcerowicz, Tom Beeckman, Lieven De Veylder, Els Prinsen, Gerrit T.S. Beemster, Kris Vissenberg\*

\*Correspondence: Kris Vissenberg [kris.vissenberg@uantwerpen.be](mailto:kris.vissenberg@uantwerpen.be)

### **1. Supplementary data**

**Supplementary Data 1** RNA sequencing data for all the genes for which expression was detected in all three replicates of at least one timepoint and genotype i.e. WT and two *PID* overexpression lines.

**Supplementary Data 2** RNA sequencing data for all 3805 differentially expressed genes in at least one timepoint and genotype i.e. WT and two *PID* overexpression lines.

### **2. Supplementary Figures and Tables**

#### **2.1 Supplementary Figures**

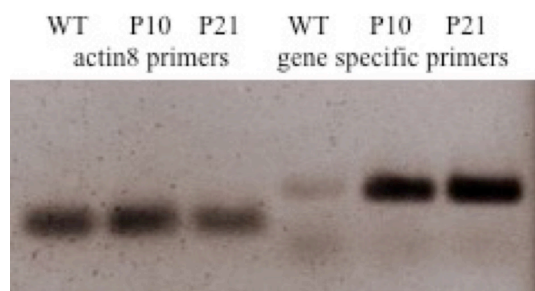

**Supplementary Figure 1** *PID* expression in overexpressing lines. RT-PCR for *PID*<sup>OE</sup> lines and WT using cDNA from the first pair of leaves at 9 DAS.

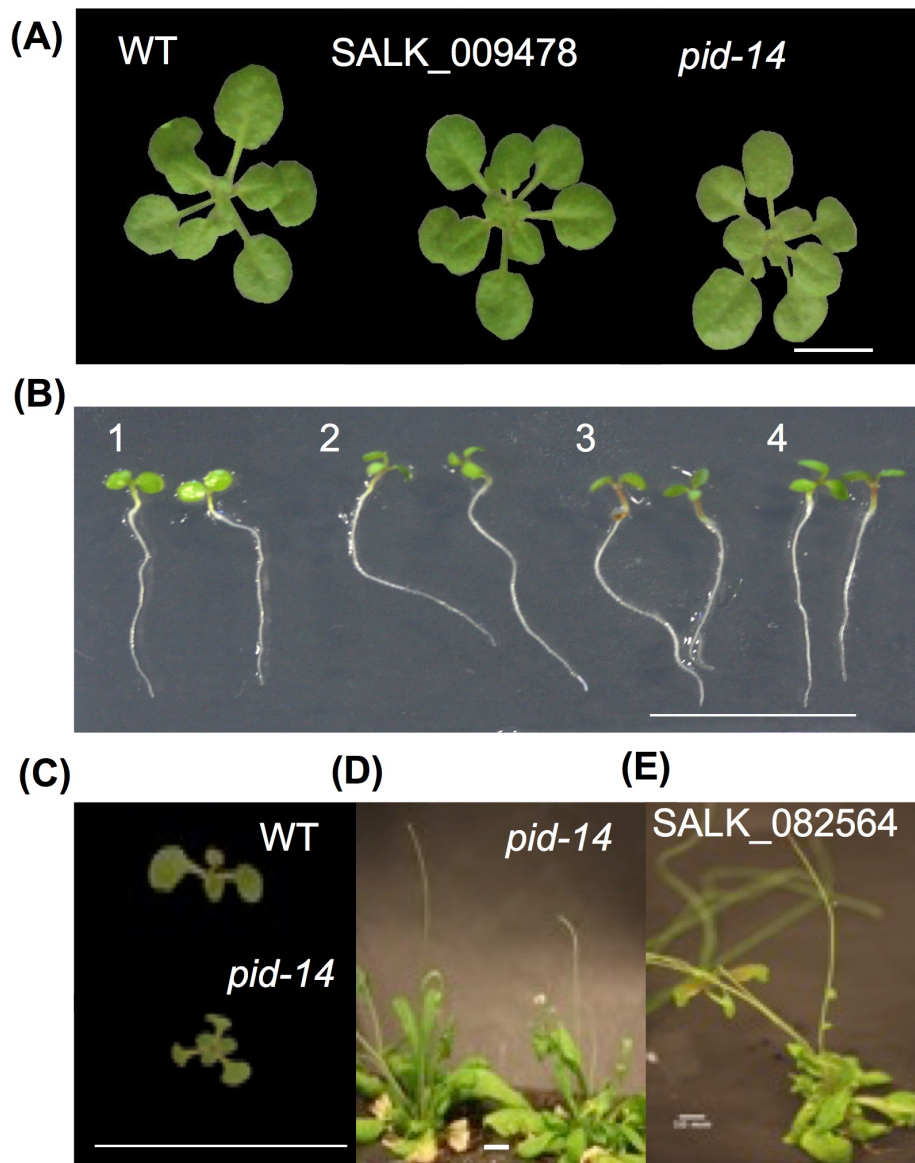

**Supplementary Figure 2 Phenotypes of Arabidopsis *pid* mutants.** Pictures of 22 DAS old rosettes of WT, SALK\_009478 and *pid-14* (A). Pictures of young seedlings with occasional three cotyledons – WT, *pid-14*, SALK\_009478, SALK\_082564 from 1- 4 in the same order (B). Cotyledon comparison between WT and *pid-14* at 12 DAS (C) *pin*-like inflorescence of *pid-14* (D) and SALK\_082564 (E). Scale bar =10 mm.

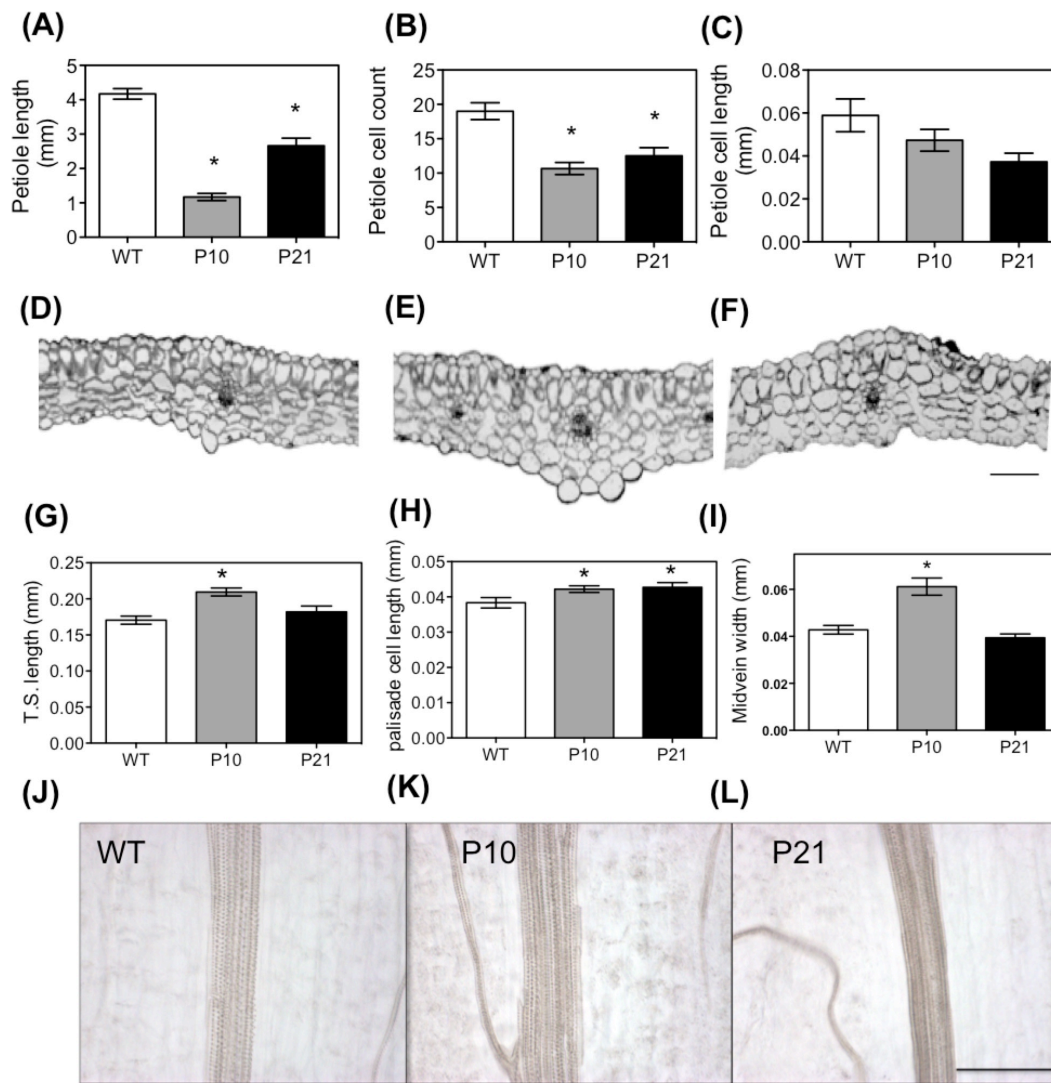

**Supplementary Figure 3 Phenotypes of Arabidopsis  $PID^{OE}$  lines.** Petiole-related measurements in WT and  $PID$  overexpression lines (A-C). Transverse section of leaves at 16 DAS - WT (D), P10 (E) and P21 (F). Graphs with width of transverse section along the midrib and length of spongy palisade cells (G,H). Midvein width comparison between genotypes (I) Midvein width comparison between WT (J), P10 (K) and P21 (L). Asterisks indicate significant differences with the wild type. Error bars represent  $\pm$  SE (t-test,  $P < 0.05$ ). Scale bar =10 mm.

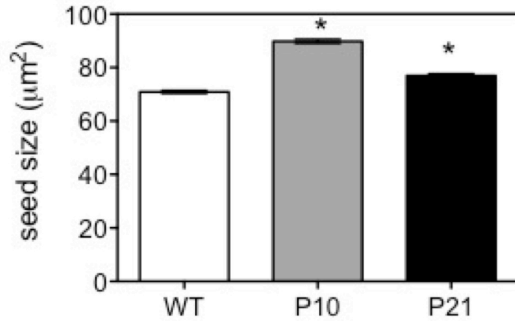

**Supplementary Figure 4 Seed size comparison between WT and *PID* overexpression lines.** Asterisks indicate differences with WT. Error bars  $\pm$  SE (t-test,  $P < 0.01$ );  $n=500-600$

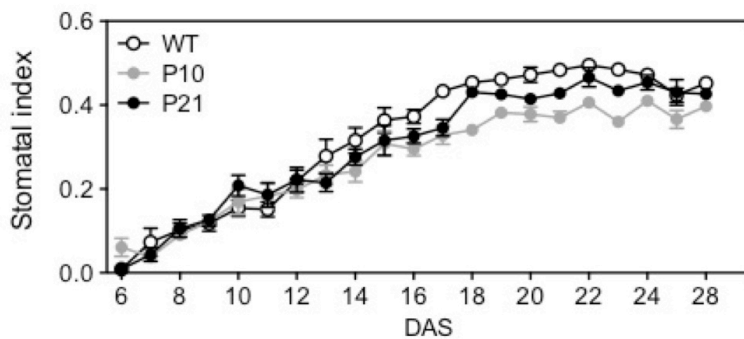

**Supplementary Figure 5 Stomatal index comparison between WT and two *PID* overexpression lines.** Stomatal index was measured throughout development of the first leaf pair. Error bars represent averages  $\pm$  SE;  $n=6$

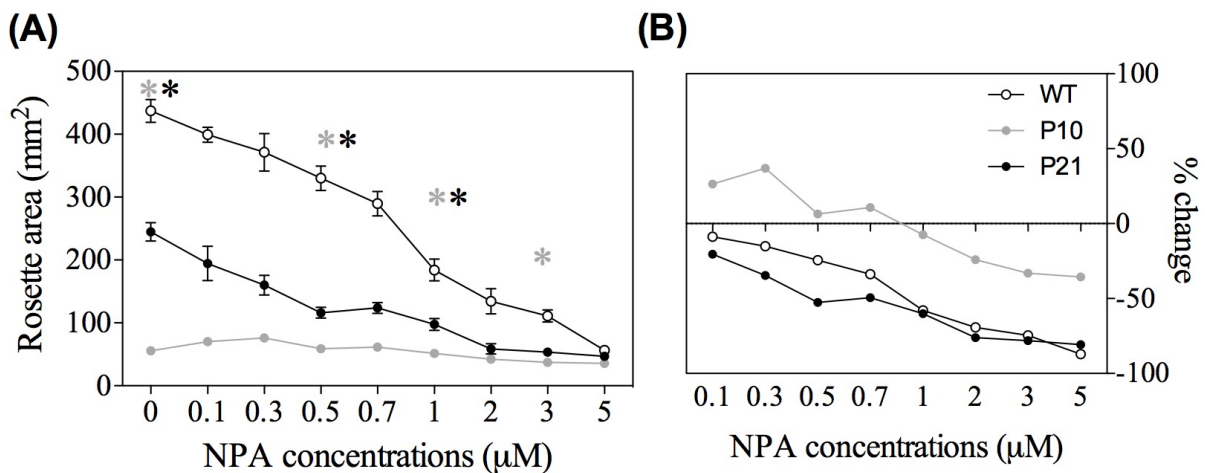

**Supplementary Figure 6 Influence of auxin transport inhibition on leaf growth.** Effect of different concentrations of NPA at 22 DAS on rosette area (A) and corresponding % change in growth (B) in WT, P10 and P21. Differences with respective control (0 NPA) are shown as percent change. Grey and black asterisks represent significant difference of P10 and P21, respectively, compared to the WT. Symbols are averages  $\pm$  SE (t-test,  $P < 0.05$ ); n=60-80.

## 2.2 Supplementary tables

**Supplementary Table 1 Primer sequences**

|                                                   |                       |                        |
|---------------------------------------------------|-----------------------|------------------------|
| SALK_082564                                       | TCCGTCATAGACAACCTCACC | GAGTAAGCGTACGAATGAGCG  |
| SALK_009478                                       | CTTTCATCGCAAATAACGAGC | CCAATCATCTTGAATTAGCCAG |
| SALK_049736 ( <i>pid-14</i> )                     | CAGTCGGGAAACTCAACTGTC | ATTTTGCGATGAAAGTTGTGG  |
| LBb1.3                                            | ATTTTGCCGATTTCGGAAC   |                        |
| Actin8                                            | TGCTGGTCGTGACCTTACTG  | CAATTTCCCGTTCTGCTGTT   |
| <i>PID</i> intron spanning primer for RT and qPCR | GAGCAGAGATGGAGAAAACGA | TGAAAATGCTTGACCATCCA   |

**Supplementary Table 2 Differentially expressed cell division related genes between WT and *PID* overexpression lines.** Significant log<sub>2</sub> fold changes are marked as boldface. Parenthesis denotes days after stratification (DAS).

| Functional category | Feature ID | Name    | P10 (9) | P21(9)        | P10 (16)      | P21 (16) |
|---------------------|------------|---------|---------|---------------|---------------|----------|
| cell cycle          | AT2G27970  | CKS2    | -0.285  | <b>-0.990</b> | 0.678         | 0.576    |
| cell cycle          | AT1G80370  | CYCA2;4 | -0.283  | -0.450        | <b>-1.897</b> | -0.684   |

|                                   |           |         |               |               |               |        |
|-----------------------------------|-----------|---------|---------------|---------------|---------------|--------|
| cell cycle                        | AT2G26760 | CYCB1;4 | -0.279        | -0.635        | <b>0.910</b>  | 0.525  |
| cell cycle                        | AT4G35620 | CYCB2;2 | -0.748        | <b>-1.226</b> | -0.141        | -1.222 |
| cell cycle                        | AT4G37630 | CYCD5;1 | -0.298        | -0.144        | <b>-1.498</b> | 0.060  |
| cell cycle                        | AT5G27620 | CYCH;1  | -0.333        | -0.534        | <b>-1.057</b> | -0.063 |
| cell cycle                        | AT2G23430 | KRP1    | 0.600         | <b>1.136</b>  | -0.342        | -0.318 |
| cell cycle                        | AT3G50630 | KRP2    | 0.011         | 0.579         | <b>0.837</b>  | -0.235 |
| cell cycle                        | AT5G48820 | KRP3    | <b>-0.913</b> | <b>-1.485</b> | -0.336        | 0.608  |
| cell cycle                        | AT1G49620 | KRP7    | 0.078         | -0.712        | <b>-1.644</b> | -0.148 |
| cell cycle                        | AT2G27970 | CKS2    | -0.285        | <b>-0.990</b> | 0.678         | 0.576  |
| E2F/DP TF                         | AT2G36010 | E2FA    | -0.232        | -0.725        | <b>-1.698</b> | 0.486  |
| E2F/DP TF                         | AT1G47870 | E2FC    | 0.531         | 0.293         | <b>-0.824</b> | -0.040 |
| E2F/DP TF                         | AT3G01330 | DEL3    | -0.725        | <b>-1.451</b> | -1.367        | -0.135 |
| DNA synthesis/chromatin structure | AT5G16690 | ORC3    | -0.869        | <b>-1.243</b> | -0.016        | 0.891  |
| cell division                     | AT3G48150 | APC8    | -0.368        | <b>-1.278</b> | 0.569         | 0.695  |
| cell division                     | AT2G18290 | APC10   | -0.968        | <b>-1.00</b>  | <b>-1.217</b> | -0.553 |
| protein modification              | AT1G02970 | WEE1    | -0.775        | <b>-1.497</b> | -0.410        | 0.427  |
| protein degradation ubiquitin.E2  | AT1G50490 | UBC20   | -0.205        | <b>-1.001</b> | 0.282         | 0.680  |
| RNA regulation of transcription   | AT4G11920 | CCS52A2 | 0.486         | <b>0.839</b>  | 0.978         | 1.087  |

**Supplementary Table 3 Differentially expressed cell expansion-related genes between WT and *PID* overexpression lines.** Significant log<sub>2</sub> fold changes are marked as boldface. Parenthesis denotes

days after stratification (DAS).

| Functional category           | Feature ID | Name     | P10 (9) | P21(9)        | P10 (16)      | P21 (16)      |
|-------------------------------|------------|----------|---------|---------------|---------------|---------------|
| cell wall precursor synthesis | AT1G12780  | UGE1     | -0.765  | -0.501        | <b>-1.490</b> | -0.606        |
|                               | AT4G23920  | UGE2     | 0.273   | 0.691         | <b>1.367</b>  | 0.035         |
|                               | AT3G02570  | MEE31    | 0.431   | <b>0.808</b>  | 0.343         | 0.191         |
| cell wall synthesis           | AT5G03760  | ATCSLA09 | 0.372   | <b>0.935</b>  | <b>0.784</b>  | 0.312         |
|                               | AT5G16190  | ATCSLA11 | 0.524   | 0.709         | -0.884        | <b>-1.728</b> |
|                               | AT4G13410  | ATCSLA15 | -0.146  | 0.516         | 1.389         | <b>3.106</b>  |
|                               | AT4G31590  | ATCSLA05 | 0.151   | 0.254         | <b>0.797</b>  | 0.300         |
|                               | AT1G24070  | ATCSLA10 | 1.178   | <b>2.298</b>  | <b>5.279</b>  | 0.566         |
|                               | AT3G28180  | ATCSLA04 | 0.377   | <b>0.890</b>  | -0.497        | -0.357        |
|                               | AT4G24010  | ATCSLAG1 | -0.266  | -0.439        | <b>1.815</b>  | -1.218        |
|                               | AT4G23990  | ATCSLAG3 | 0.596   | 0.607         | <b>1.825</b>  | -0.608        |
|                               | AT5G44030  | CESA4    | 0.292   | 0.745         | <b>1.300</b>  | 0.327         |
|                               | AT1G55850  | ATCSLE1  | 0.472   | <b>1.023</b>  | <b>1.619</b>  | -0.351        |
|                               | AT1G02730  | ATCSLD5  | -0.118  | <b>-0.819</b> | -0.146        | -0.133        |
|                               | AT1G23480  | ATCSLAO3 | -0.404  | -0.411        | <b>-1.407</b> | 0.116         |
|                               | AT2G03220  | FT1      | -0.085  | 0.220         | <b>0.901</b>  | 0.133         |
|                               | AT5G62620  |          | 0.401   | <b>0.796</b>  | <b>1.273</b>  | -0.016        |
|                               | AT2G20370  | KAM1     | 0.737   | <b>0.843</b>  | <b>0.908</b>  | 0.085         |
|                               | AT5G54690  | GAUTL1   | 2.157   | <b>2.887</b>  | <b>1.458</b>  | 0.818         |

## Supplementary Material

|                       |           |         |               |               |               |               |
|-----------------------|-----------|---------|---------------|---------------|---------------|---------------|
|                       | AT1G19300 | GALT1   | 0.472         | 0.245         | <b>0.931</b>  | -0.089        |
|                       | AT5G33290 | XGD1    | 0.540         | 0.734         | <b>1.889</b>  | -0.142        |
| cell wall proteins    | AT5G03170 | FLA11   | 0.682         | <b>1.066</b>  | 0.825         | 0.717         |
|                       | AT5G55730 | FLA1    | 0.253         | 0.279         | <b>0.831</b>  | 0.646         |
|                       | AT2G47930 | AGP26   | -0.088        | 0.325         | <b>-1.561</b> | -0.350        |
|                       | AT4G16980 |         | 0.133         | 0.355         | <b>-1.188</b> | 0.150         |
|                       | AT5G44130 | FLA13   | -0.018        | -0.001        | <b>-0.795</b> | 0.045         |
|                       | AT4G12730 | FLA2    | -0.033        | 0.229         | <b>-0.851</b> | 0.071         |
|                       | AT2G42800 | AtRLP29 | -0.214        | <b>-1.593</b> | 0.629         | 0.151         |
|                       | AT3G24480 |         | <b>1.324</b>  | <b>1.385</b>  | <b>-0.832</b> | 0.075         |
|                       | AT4G16790 |         | 0.804         | <b>1.677</b>  | -0.659        | -0.414        |
|                       | AT1G76930 | ATEXT4  | <b>-1.966</b> | -1.925        | -1.759        | 2.742         |
|                       | AT3G22440 |         | 0.269         | 0.546         | <b>1.277</b>  | 0.045         |
| cell wall degradation | AT1G22880 | CEL5    | -0.169        | -0.211        | -0.028        | <b>-0.792</b> |
|                       | AT2G32990 | AtGH9B8 | 1.320         | 1.785         | <b>1.586</b>  | 0.529         |
|                       | AT3G52840 | BGAL2   | -0.102        | -0.013        | <b>0.874</b>  | -0.336        |
|                       | AT5G64570 | XYL4    | -0.704        | <b>-1.191</b> | 0.031         | 0.554         |
|                       | AT5G66460 | ATMAN7  | 0.159         | 0.666         | <b>2.421</b>  | -0.242        |
|                       | AT4G30270 | MER15B  | -0.150        | -0.067        | <b>-3.653</b> | -0.405        |
|                       | AT3G19620 | ANAC001 | <b>1.934</b>  | <b>2.938</b>  | <b>1.883</b>  | -0.356        |
|                       | AT1G58370 | RXF12   | 1.443         | 0.775         | <b>-2.034</b> | -0.168        |



|                        |           |          |               |               |               |               |
|------------------------|-----------|----------|---------------|---------------|---------------|---------------|
|                        | AT5G49360 | BXL1     | <b>-1.675</b> | <b>-2.372</b> | <b>-3.774</b> | -0.612        |
|                        | AT1G02640 | BXL2     | <b>-1.370</b> | <b>-2.140</b> | -0.066        | -0.030        |
|                        | AT1G67750 |          | 0.442         | <b>0.897</b>  | <b>2.821</b>  | <b>1.099</b>  |
|                        | AT1G10640 |          | 0.321         | 0.666         | <b>1.877</b>  | <b>1.369</b>  |
|                        | AT4G23820 |          | -0.013        | -0.327        | -0.361        | <b>0.787</b>  |
|                        | AT5G14650 |          | -1.067        | -0.202        | <b>1.504</b>  | <b>1.250</b>  |
|                        | AT1G56710 |          | 1.351         | <b>2.360</b>  | <b>2.008</b>  | 1.141         |
|                        | AT5G49215 |          | 0.233         | 0.500         | <b>-1.238</b> | 0.368         |
|                        | AT1G23460 |          | -0.327        | <b>1.002</b>  | 0.768         | -0.393        |
|                        | AT1G09890 |          | 0.954         | 0.841         | <b>2.561</b>  | 1.054         |
|                        | AT5G63180 |          | 0.722         | <b>0.967</b>  | -0.296        | -0.071        |
|                        | AT1G19170 |          | -0.223        | -0.019        | <b>1.026</b>  | 0.145         |
| cell wall modification | AT2G20750 | ATEXPB1  | 0.826         | <b>1.255</b>  | <b>0.878</b>  | <b>1.192</b>  |
|                        | AT5G56320 | ATEXPA14 | -1.659        | -0.744        | <b>-2.201</b> | <b>-1.495</b> |
|                        | AT4G30290 | ATXTH19  | -0.899        | -1.119        | <b>-4.254</b> | <b>-2.082</b> |
|                        | AT4G28250 | ATEXPB3  | 0.327         | 0.086         | <b>2.198</b>  | 0.682         |
|                        | AT3G44990 | XTR8     | 0.283         | <b>0.842</b>  | <b>-1.485</b> | -0.331        |
|                        | AT2G37640 | ATEXPA3  | -0.240        | -0.402        | <b>-0.787</b> | 0.445         |
|                        | AT3G55500 | ATEXPA16 | 0.379         | <b>1.565</b>  | 2.036         | -0.847        |
|                        | AT4G17030 | AEXLB1   | 0.478         | <b>1.943</b>  | <b>2.981</b>  | 0.219         |
|                        | AT5G65730 | XTH6     | -0.499        | 0.190         | <b>-2.228</b> | 0.155         |

## Supplementary Material

|           |           |              |              |               |               |
|-----------|-----------|--------------|--------------|---------------|---------------|
| AT2G39700 | ATEXPA4   | 0.112        | 0.372        | <b>1.205</b>  | 0.172         |
| AT2G06850 | EXGT-A1   | -0.374       | 0.108        | <b>-0.882</b> | 0.046         |
| AT4G38210 | ATEXPA20  | -0.162       | -0.310       | <b>1.235</b>  | -0.091        |
| AT4G37800 | XTH7      | -0.300       | <b>0.894</b> | -0.419        | 0.011         |
| AT1G11580 | ATPMEPCRA | 0.737        | 0.213        | <b>-0.949</b> | <b>-0.803</b> |
| AT5G53370 | ATPMEPCRF | 0.469        | <b>1.578</b> | 0.458         | -0.156        |
| AT1G53830 | ATPME2    | -0.422       | -0.422       | <b>-1.665</b> | -1.114        |
| AT3G49220 |           | 0.278        | 0.365        | <b>0.987</b>  | 0.110         |
| AT5G47500 | PME5      | 0.211        | 0.216        | <b>1.794</b>  | -0.208        |
| AT1G41830 | SKS6      | 0.590        | <b>0.775</b> | -0.124        | -0.033        |
| AT3G43270 |           | 1.084        | <b>1.557</b> | 0.157         | 0.124         |
| AT1G57590 |           | -0.159       | -0.710       | 1.959         | <b>-2.307</b> |
| AT3G09410 |           | 0.230        | 0.174        | <b>0.790</b>  | -0.523        |
| AT1G23200 | HMS       | 1.546        | <b>2.103</b> | <b>2.433</b>  | -1.056        |
| AT3G59010 | PME35     | <b>1.371</b> | <b>1.050</b> | <b>1.535</b>  | 0.175         |
